# Supplementary material
Source: PubMed Central journal article supplement (PMC3125461)
Supplement: NIHMS293393-supplement-1.pdf [file NIHMS293393-supplement-1.pdf]

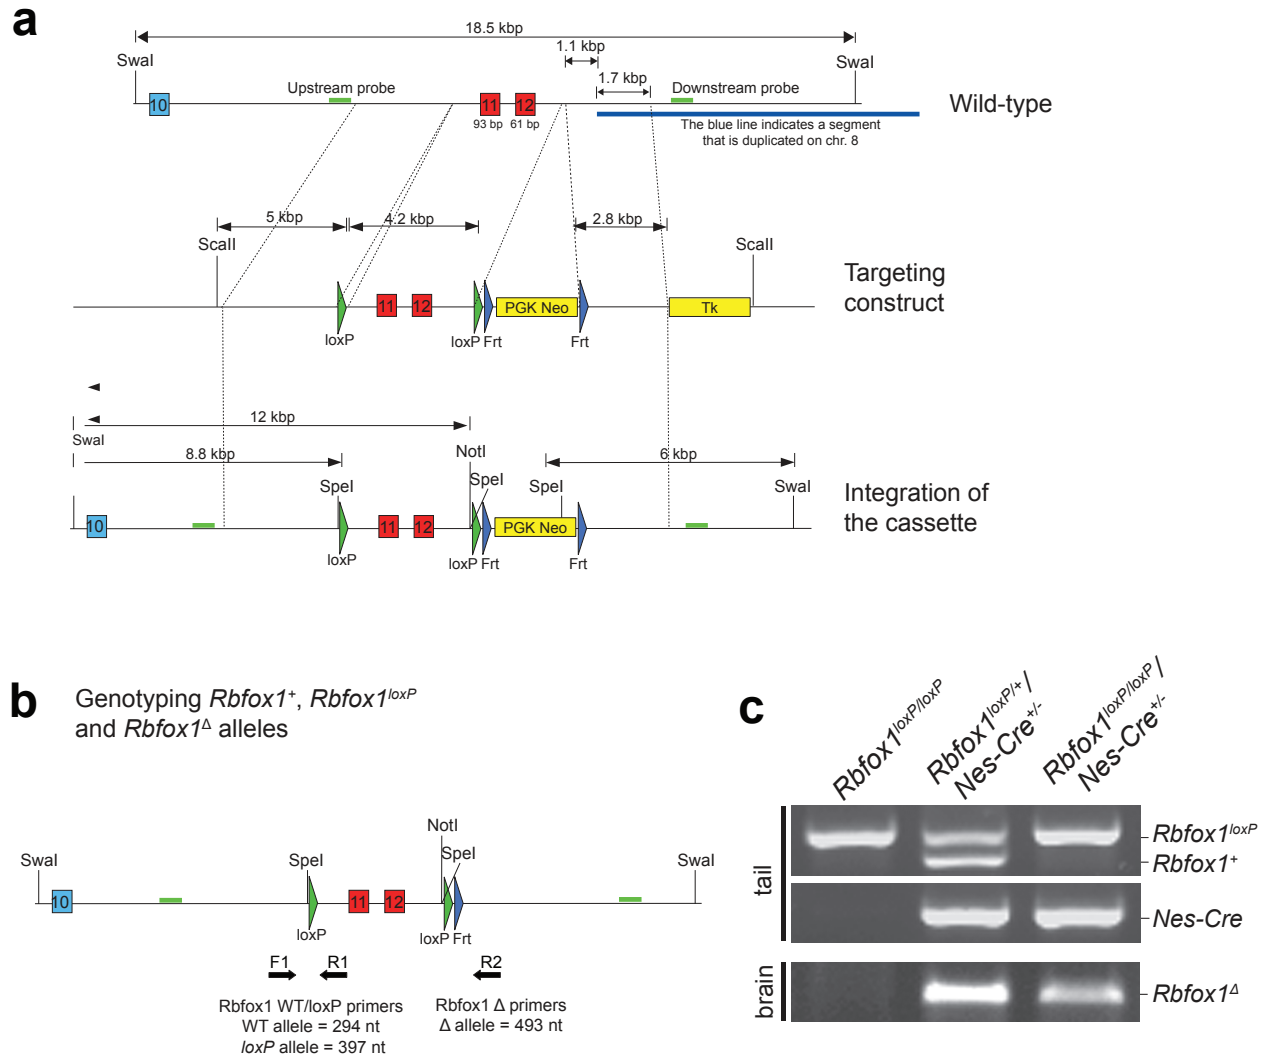

**Supplementary Figure 1. Design of the *Rbfox1* targeting construct and genotyping of the *Rbfox1* alleles.** (a) Schematics of the relevant portion of the wild-type (WT) *Rbfox1* gene, the targeting construct, and the integrated construct genomic DNA. (b) Schematic showing the *Rbfox1*<sup>loxP</sup> allele after removal of the *neo* selection cassette plus the location of primers for genotyping the WT (*Rbfox1*<sup>+</sup>), *Rbfox1*<sup>loxP</sup>, and *Rbfox1*<sup>Δ</sup> alleles, with PCR product sizes indicated. The *Rbfox1*<sup>Δ</sup> allele will only be amplified by PCR after Cre-mediated recombination. (c) Agarose gel showing PCR genotyping of DNA extracted from the tail and brain of *Rbfox1*<sup>loxP/loxP</sup>, *Rbfox1*<sup>loxP/+</sup>/*Nestin-Cre*<sup>+/-</sup>, and *Rbfox1*<sup>loxP/loxP</sup>/*Nestin-Cre*<sup>+/-</sup> mice. Sequences for genotyping primers are listed in Supplementary Table 3.

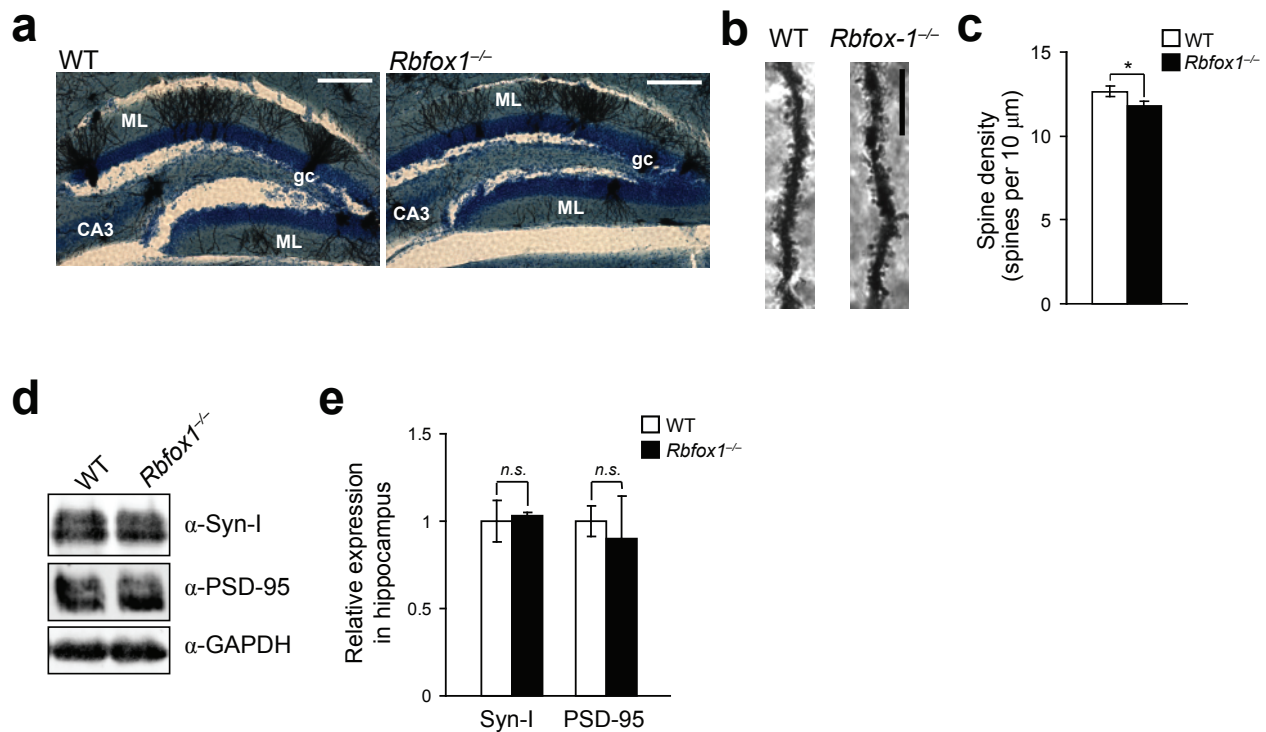

**Supplementary Figure 2. *Rbfox1*<sup>-/-</sup> dentate gyrus granule cells exhibit a very modest decrease in dendritic spine density and no changes in expression of synaptic proteins.** (a) Representative Golgi-Cox–stained images of adult WT and *Rbfox1*<sup>-/-</sup> dentate gyrus, counterstained with thionin (blue). Abbreviations: ML, molecular layer of the dentate gyrus; gc, granule cell; CA3, pyramidal layer of the hippocampus. Scale bar, 0.2 mm. (b) Representative Golgi-Cox–stained images of dendrites from WT and *Rbfox1*<sup>-/-</sup> dentate gyrus granule cells. Scale bar, 10 μm. (c) Quantification of overall spine density per 10 μm. Results are mean ± s.e.m.; *n* = 28 or 29 dendritic segments from 2 mice for each genotype. \**P*=0.031 by one-tailed Student’s *t* test. (d) Representative immunoblot analysis of Synapsin-I (Syn-I) and PSD-95 in total protein lysates from WT and *Rbfox1*<sup>-/-</sup> hippocampus. GAPDH was used as a loading control. (e) Quantification of relative Syn-I and PSD-95 expression in hippocampus, normalized by GAPDH. Results are mean ± s.e.m.; *n* = 3 animals per genotype. *n.s.*, no significant difference by one-tailed Student’s *t* test (*P*=0.404 and *P*=0.363, respectively).

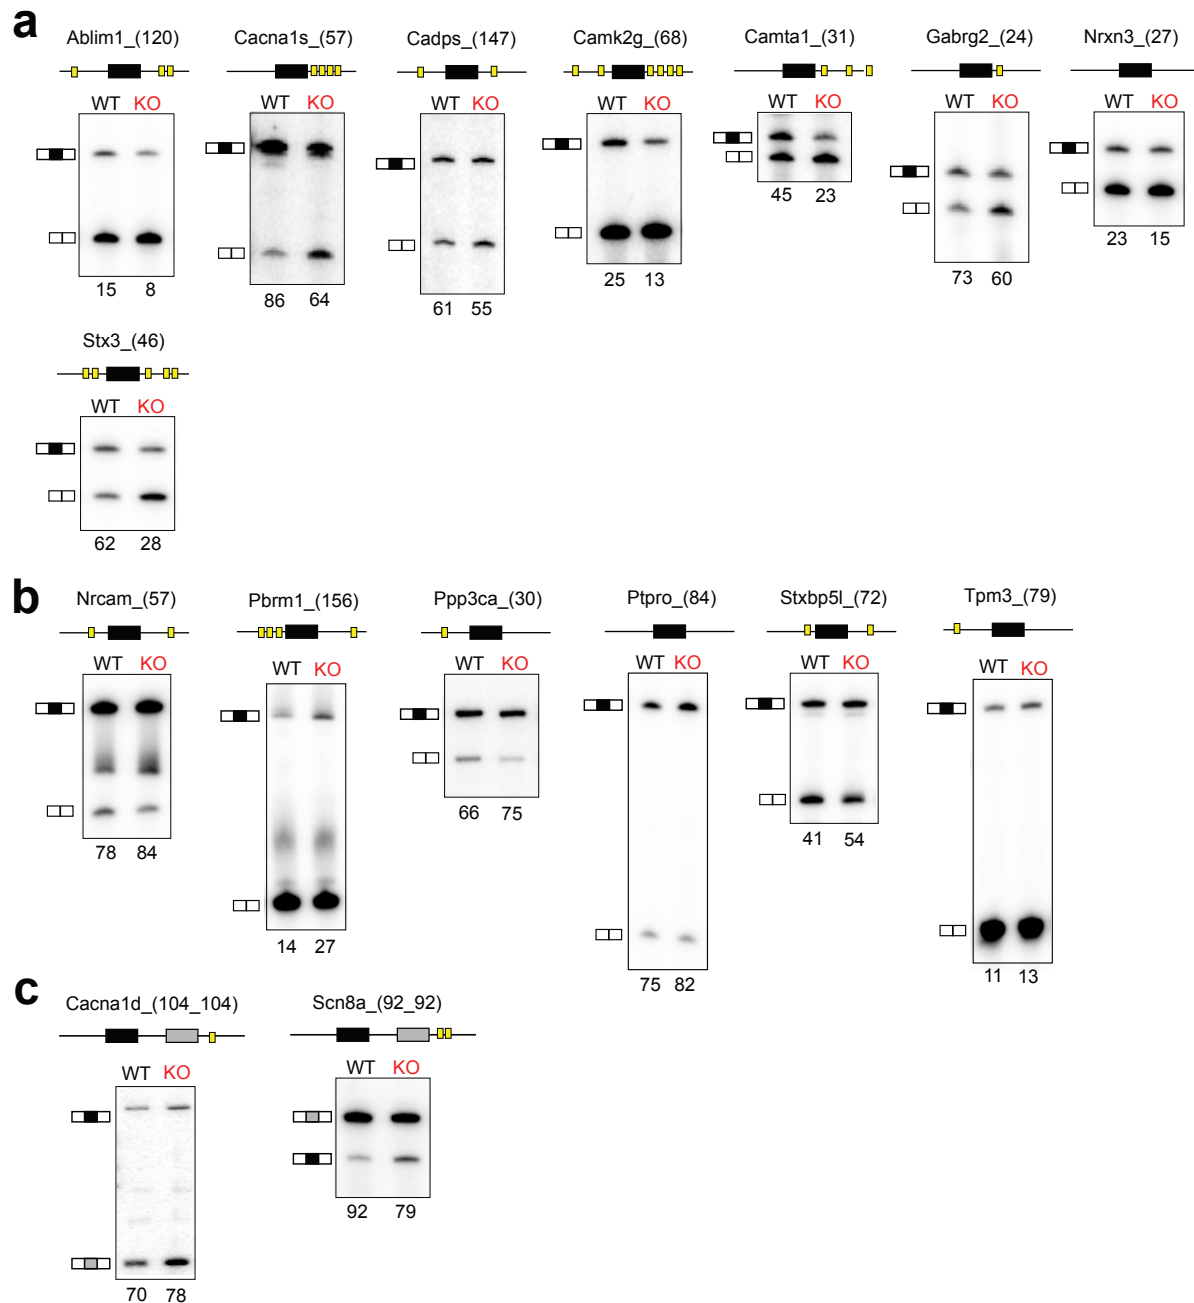

**Supplementary Figure 3. Representative RT-PCR gels for all remaining significant splicing changes identified in *Rbfox1*<sup>-/-</sup> brain. (a) and (b) Representative RT-PCR gels for alternative cassette exons exhibiting decreased inclusion (a) and increased inclusion (b) in *Rbfox1*<sup>-/-</sup> brain (KO) compared to WT. (c) RT-PCR gels for mutually exclusive exon pairs analyzed by digestion with restriction endonucleases; exon inclusion levels were calculated for the downstream exon. Schematic above each gel shows the relative location of (U)GCAUG sequences (yellow boxes) in flanking introns. For all images, numbers below the gel show mean percentage inclusion levels of the alternative exon.**

**a**

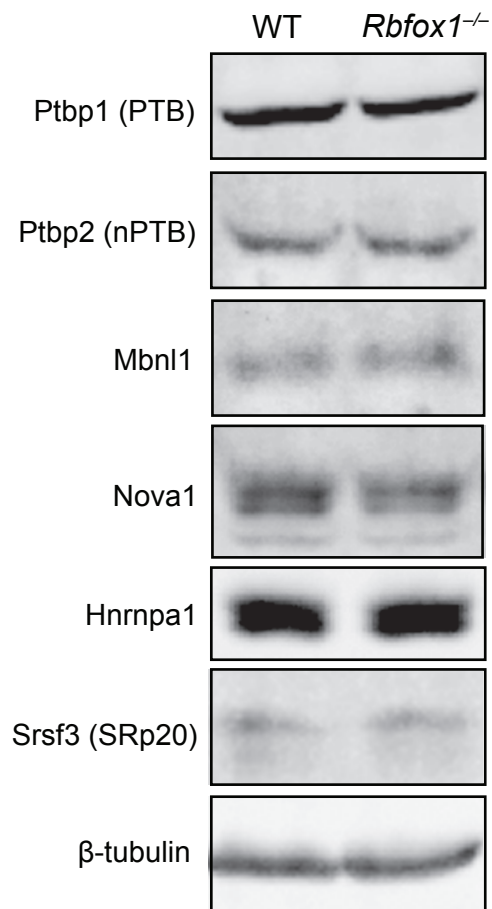

**Supplementary Figure 4. The expression of other splicing factors is largely unchanged in the *Rbfox1*<sup>-/-</sup> brain.** (a) Immunoblot analysis of six well-characterized splicing factors in total protein lysates isolated from WT and *Rbfox1*<sup>-/-</sup> brains.  $\beta$ -tubulin was used as a loading control for total protein. Only Nova1 shows a slight decrease (-40%) in *Rbfox1*<sup>-/-</sup> brain compared to WT.

|                                                       | <b>WT</b> | <b><i>Rbfox1</i><sup>-/-</sup></b> | <b><i>Rbfox1</i><sup>+/-</sup></b> | <b><i>Rbfox2</i><sup>-/-</sup></b> |
|-------------------------------------------------------|-----------|------------------------------------|------------------------------------|------------------------------------|
| Animals with stage 5 seizures <sup>†</sup>            | 8/10      | 4/4                                | 4/4                                | 4/4                                |
| Latency (minutes) to 1st stage 5 seizure <sup>‡</sup> | 48.3±8.9  | 19.7±5.8*                          | 19.5±2.6*                          | 36.5±7.8 <sup>a</sup>              |
| Duration (seconds) of stage 5 seizures                | 12.4±2.8  | 73.2±16.8*                         | 61.6±21.0 <sup>a</sup>             | 9.8±3.6 <sup>a</sup>               |
| Deaths                                                | 0/10      | 4/4*                               | 4/4*                               | 0/4 <sup>a</sup>                   |
| Latency to status epilepticus/death <sup>‡</sup>      | n/a       | 31.3±4.8                           | 31.3±2.9                           | n/a                                |

**Supplementary Table 1. Summary of behavioral response to KA-induced seizures.**

<sup>†</sup>A stage 5 seizure is defined as a tonic-clonic seizure characterized by continuous rearing and falling<sup>32</sup>.

<sup>‡</sup>Latency to 1st stage 5 seizure and to status epilepticus (mean ± s.e.m.) is calculated from the time of KA administration.

\*Significantly different from WT (one-tailed Student's *t* test, *P*<0.05).

<sup>a</sup>Not significantly different from WT (one-tailed Student's *t* test, *P*>0.05).

| Alt event ID <sup>‡</sup> | MJAY Ratio <sup>†</sup> | RT-PCR                           |                | Upstream (U)GCAUG | Downstream (U)GCAUG |
|---------------------------|-------------------------|----------------------------------|----------------|-------------------|---------------------|
|                           |                         | $\Delta$ PSI (Mean $\pm$ s.e.m.) | RT-PCR P value |                   |                     |
| 1 Kcnd3_(57)              | +2.47                   | +28.17 $\pm$ 7.53                | 0.03233*       | (-16)             | (+83)               |
| 2 Camta1_(31)             | -1.48                   | -22.16 $\pm$ 1.94                | 0.00378*       | n/a               | (+70, +210, +252)   |
| 3 Camkk2_(43)             | -1.15                   | +2.42 $\pm$ 1.17                 | 0.08697        | n/a               | (+196, +217, +295)  |
| 4 Grin1_(63)              | -1.06                   | -23.29 $\pm$ 2.66                | 0.00641*       | n/a               | (+8, +262)          |
| 5 Stxbp5l_(72)            | +1.03                   | +13.57 $\pm$ 4.51                | 0.04757*       | (-13)             | (+130)              |
| 6 Tmem41b_(118)           | -0.98                   | n/a                              | n/a            | (-185)            | n/a                 |
| 7 Nt5c2_(59)              | +0.92                   | +0.70 $\pm$ 0.34                 | 0.08756        | n/a               | (+254)              |
| 8 Scn8a_(92_92)           | -0.89                   | -12.33 $\pm$ 0.81                | 0.00216*       | n/a_n/a           | n/a_(+114, +192)    |
| 9 Pbrm1_(156)             | +0.81                   | +13.22 $\pm$ 2.52                | 0.01729*       | (-78, -44, -31)   | (+233)              |
| 10 Trpm1_(196)            | +0.78                   | n/a                              | n/a            | n/a               | n/a                 |
| 11 Ablim1_(120)           | -0.72                   | -6.93 $\pm$ 0.93                 | 0.00871*       | (-255)            | (+123, +171)        |
| 12 Ppp3ca_(30)            | +0.71                   | +8.55 $\pm$ 1.97                 | 0.02465*       | (-188)            | n/a                 |
| 13 Pld3_(75_84)           | +0.67                   | -1.60 $\pm$ 0.72                 | 0.07834        | n/a_n/a           | n/a_(+123)          |
| 14 Ptpro_(84)             | +0.65                   | +6.97 $\pm$ 2.22                 | 0.04400*       | n/a               | n/a                 |
| 15 Taf1b_(98)             | +0.64                   | +8.22 $\pm$ 8.55                 | 0.21890        | (-261, -244)      | n/a                 |
| 16 Tpk1_(147)             | -0.62                   | +2.79 $\pm$ 1.19                 | 0.07191        | (-305)            | n/a                 |
| 17 Tpm3_(79)              | +0.61                   | +1.92 $\pm$ 0.31                 | 0.01277*       | (-260)            | n/a                 |
| 18 Tmem180_(172)          | +0.61                   | +2.45 $\pm$ 2.08                 | 0.18023        | n/a               | n/a                 |
| 19 Myom1_(294)            | +0.61                   | -2.31 $\pm$ 3.36                 | 0.28156        | n/a               | (+282)              |
| 20 Ccdc38_(183)           | +0.60                   | n/a                              | n/a            | (-115)            | n/a                 |
| 21 Dguok_(113)            | +0.60                   | -0.24 $\pm$ 1.27                 | 0.43457        | n/a               | (+231)              |
| 22 Fbf1_(140)             | +0.59                   | -0.15 $\pm$ 0.24                 | 0.29756        | (-153)            | (+57)               |
| 23 Nrnx3_(27)             | -0.57                   | -7.61 $\pm$ 1.30                 | 0.01400*       | n/a               | n/a                 |
| 24 Nrcam_(57)             | +0.57                   | +5.46 $\pm$ 0.69                 | 0.00773*       | (-136)            | (+171)              |
| 25 Cacna1d_(60)           | -0.56                   | -20.64 $\pm$ 5.03                | 0.02726*       | (-47)             | n/a                 |

**Supplementary Table 2. Summary of microarray results and RT-PCR validation for splicing changes in *Rbfox1*<sup>-/-</sup> brain.**

<sup>‡</sup>Alternative events identified by microarray (MJAY) were checked by RT-PCR and mean percentage change in exon inclusion in *Rbfox1*<sup>-/-</sup> compared to WT were calculated. Location of (U)GCAUG sequences and alternative event nomenclature as in Table 1.

<sup>†</sup>MJAY ratio is described in Supplementary Methods.

\*Significant deviation from WT, as determined by paired, one-tailed Student's *t* test.

| Primer Pair              | Purpose / alt event coordinates*  | Forward primer <sup>†</sup>                                                            | Reverse primer <sup>†</sup>                                                              |
|--------------------------|-----------------------------------|----------------------------------------------------------------------------------------|------------------------------------------------------------------------------------------|
| 1 Probe-Rbfox1_knpr_frt  | Southern blot hybridization probe | AAACCAGATTTCCATACTCATCA                                                                | TGTTATTGGGTCTAGGCTGGT                                                                    |
| 2 5' Probe               | Southern blot hybridization probe | ATCAGCACCCCTGAGAAATGC                                                                  | GGCATGGGTAATTTTCCTGT                                                                     |
| 3 3' Probe               | Southern blot hybridization probe | CCTGGTTTTGGCTGCATATTT                                                                  | GGCATGGGTAATTTTCCTGT                                                                     |
| 4 PL253-Rbfox1           | Recombineering primer             | tcacagacaatgttgaactcttatgaaattatctcctat<br>gaggagtgtttgcGTATTGGTCACCACGG<br>CCGAGTTTC  | agaccattcccctttggcaaacaggaagctgcaacgt<br>agactggaccaaggaCGGTGGGGTATCGA<br>CAGAGTGCCAG    |
| 5 PL452-Rbfox1           | Recombineering primer             | tcactgacatggtcttatgatgagtatgaaatctggtt<br>tactactactcttaaCTGCAGCCCAATTCCG<br>ATCATATTC | tccaaaggttggtatgtatgtaacttaacaaaatgtacaa<br>ataagcttaaggattTAGAACTAGTGGATCC<br>CCTCGAGGG |
| 6 PL451-Rbfox1           | Recombineering primer             | acatttataactctcatataaatgtgaagcaaatTTTTT<br>ctggtgatggtggGACGGTATCGATAAGCT<br>TGATATCG  | gacatgaagctgtggtatgacatgcagagcatgtacaa<br>gactctaggtccaagtcGCGGCCGCTCTAGA<br>ACTAGTGGATC |
| 7 Rbfox1 WT/loxP alleles | Genotyping primer                 | ATGCCATGCAGTGAAAAAT                                                                    | TGCAGCACATTGAAACCTTC                                                                     |
| 8 Rbfox1 Δ allele        | Genotyping primer                 | ATGCCATGCAGTGAAAAAT                                                                    | AGCCAGTCAGCTGGAGTGT                                                                      |
| 9 Nestin-Cre allele      | Genotyping primer                 | CGTGTTCGACTGAACGCTAA                                                                   | GCAAACGGACAGAGCATTTT                                                                     |
| 10 Ablim1_(120)          | chr19:57,133,575-57,133,694       | CTCCATCAACTCCCCTGTGT                                                                   | TGGGTGGTTTTTCGGTAAATG                                                                    |
| 11 Cacna1d_(104_104)     | chr14:30,984,482-30,985,245       | CCCAATGGAGGCATCACT                                                                     | CTTCCAGCTGCTGTTTTTCC                                                                     |
| 12 Cacna1d_(60)          | chr14:30,942,975-30,943,034       | CACCAGCCGAGACTGAATCTG                                                                  | TGAGTTTTGATTTCGAGATGG                                                                    |
| 13 Cacna1s_(57)          | chr1:138001147-138001203          | TTTGGAGATCCTTGGAATGTG                                                                  | AGTCTCATGACCCGGAACAG                                                                     |
| 14 Cadps_(147)           | chr14:13,290,197-13,290,343       | CGCCCCACTTGTGTAGAT                                                                     | TTTGACGCAGGACTCAATCA                                                                     |
| 15 Camk2g_(68)           | chr14:21,576,888-21,576,955       | GGTCTACGGTGGCATCCAT                                                                    | CCGCCATCTGACTTCTTGT                                                                      |
| 16 Camkk2_(43)           | chr5:123,186,997-123,187,039      | CATGATTCGAAAGCGCTCAT                                                                   | GTCTTCGCTGCCTTGCTTC                                                                      |
| 17 Camta1_(31)           | chr4:150,445,535-150,445,565      | GCCATCCTTATCCAGAGCAA                                                                   | TCCTTGGCCTTTTTCAATTC                                                                     |
| 18 Ccdc38_(183)          | chr10:93,041,454-93,041,636       | TGAGGTCCAGGCTCTTCAGT                                                                   | AGCATCTCCGATGCAGACTC                                                                     |
| 19 Dguok_(113)           | chr6:83,446,680-83,446,792        | GCATTGAAGGCAACATCG                                                                     | GGCTCCAGCTGCACCTTC                                                                       |
| 20 Fbf1_(140)            | chr11:116,019,334-116,019,473     | GGTCTTCTGCAGAACATGAA                                                                   | CTTTCCAGGACCCCTTTCG                                                                      |
| 21 Gabrg2_(24)           | chr11:41,727,472-41,727,495       | ATTTTGTGAGCAACCGGAAG                                                                   | ACAGTCTTGCATCCAAAC                                                                       |
| 22 Grin1_(63)            | chr2:25,166,863-25,166,925        | CCCTACTCCCACAGTCCAGCGTC                                                                | AGCGTCGCTCCTCGCTGCAGAAAGG                                                                |
| 23 Kcnd3_(57)            | chr3:105,469,880-105,469,936      | GGCAAGACCACCTCACTCAT                                                                   | AGTGGCTGGACAGAGAAGGA                                                                     |
| 24 Myom1_(294)           | chr17:71,431,543-71,431,836       | GGTCAGAGCAGTGAATGCAG                                                                   | ATGTCATAGGGCCGAGATG                                                                      |
| 25 Nrcam_(57)            | chr12:45,646,366-45,646,422       | GAGGACACCCGTGAGGACTA                                                                   | TTTCATTGCCCTCTGGAGTT                                                                     |
| 26 Nrnx3_(27)            | chr12:90,756,350-90,756,376       | CTCATCAACGATGCTCTCCA                                                                   | TCATTGCACTGGTTTTCCAGA                                                                    |
| 27 Nt5c2_(59)            | chr19:46,983,980-46,984,038       | ACCGAAGTTTAGCCATGGAA                                                                   | CCTGAGGATAGCCAAATGGAA                                                                    |
| 28 Pbrm1_(156)           | chr14:31,927,035-31,927,190       | TGGGGACAGAATGGAGAAAC                                                                   | ATGGGGGCTACTCCTTGATT                                                                     |
| 29 Pld3_(75_84)          | chr7:28,330,205-28,334,117        | GGGGCTAGGTTCTGGAGTAGA                                                                  | AAAGGGGTGGTCCTGAGC                                                                       |
| 30 Ppp3ca_(30)           | chr3:136,594,975-136,595,004      | CTGACACTGAAGGGCCTGAC                                                                   | GAGGTGGCATCCTCTCGTTA                                                                     |
| 31 Ptpro_(84)            | chr6:137,368,845-137,368,928      | GGAGCTGGCACGTTTTGTTA                                                                   | TTTTCTCTCTTTAAGCCATTTTT                                                                  |
| 32 Scn8a_(92_92)         | chr15:100,789,771-100,790,125     | GACCCGTGGAAGTGGTTAGA                                                                   | TCCAGATAGCTCTCGTTGAAGTT                                                                  |
| 33 Snap25_(118_118)      | chr2:136,595,478-136,595,910      | ATGGCCGAAGACGACATGCGC                                                                  | TTAACCACCTCCAGCATCTTTGT                                                                  |
| 34 Stx3_(46)             | chr19:11,864,538-11,864,583       | ACAGCCTTCATGGACGAGTT                                                                   | GTTGTTGGCCCTTTTCTTGA                                                                     |
| 35 Stxbp5l_(72)          | chr16:37,186,737-37,186,808       | GCTATTAAGCATGGGGACCA                                                                   | CCAGGGGAACTGGACTATCA                                                                     |
| 36 Taf1b_(98)            | chr12:25,193,949-25,194,046       | CCCCAACCAAGATCAACT                                                                     | AGGCCTGTTTGCTCTTCTGA                                                                     |
| 37 Tmem180_(172)         | chr19:46,446,426-46,446,597       | GACCACATCTCCCTGTCCAC                                                                   | AGAAGCAGAGAAGCCAGGTG                                                                     |
| 38 Tmem41b_(118)         | chr7:117,126,170-117,126,287      | CCACCGAAATGTTGCACTC                                                                    | CCATATCTCTGGAACTTCA                                                                      |
| 39 Tpk1_(147)            | chr6:43,419,001-43,419,147        | CCTGACCAAGACCACACTGA                                                                   | TGTCTACATGGAGCCTGTGC                                                                     |
| 40 Tpm3_(79)             | chr3:89,894,935-89,895,013        | CGTGCTGAGTTTGCTGAAAG                                                                   | GCTCCTCTTTGGTGCACCTTC                                                                    |
| 41 Trpm1_(196)           | chr7:71,344,049-71,344,244        | TGCAAAAGGGAATGCATCTT                                                                   | CCCAAACACTGCTTCAGTT                                                                      |

**Supplementary Table 3. List of primer sequences used for generating Rbfox1 transgenic mice, genotyping *Rbfox1* and *Nestin-Cre* alleles, and for RT-PCR assays.**

\*Purpose of the primer pair; genomic coordinates (UCSC July 2007 assembly mm9) for the alternative event are listed if the primer pair was used for RT-PCR.

<sup>†</sup>Primer sequences listed 5' to 3'.
